# Supplementary material for: High sensitivity chlorogenic acid detection based on multiple layer-by-layer self-assembly films of chitosan and multi-walled carbon nanotubes on a glassy carbon electrode
Source: Royal Society of Chemistry journal article supplement (doi:10.1039/c6ra26378j), 2017-01-01
Supplement: c6ra26378j1.pdf [file c6ra26378j1.pdf]

## Electronic Supplementary Information

### **High sensitivity chlorogenic acid detection based on multiple layer-by-layer self-assembly films of chitosan and multi-walled carbon nanotubes on a glassy carbon electrode**

Wenxue Cheng,<sup>a</sup> Jianzhi Huang,<sup>a</sup> Cheng Liu,<sup>a</sup> Qiang Zeng,<sup>\*a</sup> Yanli Tong,<sup>\*b</sup> Lishi Wang,<sup>a</sup> and Faliang Cheng<sup>\*c</sup>

a: School of Chemistry and Chemical Engineering, South China University of Technology, Guangzhou 510641, People's Republic of China.

b: Guangdong No.2 Provincial People's Hospital, Guangzhou 510317, People's Republic of China.

E-mail: ceqzeng@scut.edu.cn; tongh2008@126.com;

Tel: +86 20 87112906

\*Corresponding authors.

1) Dr. Qiang Zeng, E-mail address: ceqzeng@scut.edu.cn;

2) Prof. Yanli Tong, E-mail address: tongh2008@126.com.

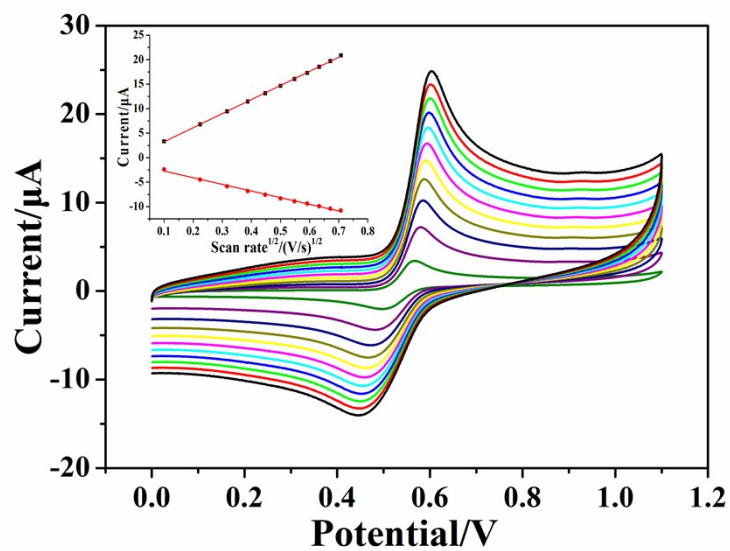

**Fig. S1** Cyclic voltammograms of  $1 \times 10^{-4}$  mol dm<sup>-3</sup> chlorogenic acid in phosphate buffer solution (pH 1.0) recorded on the bare electrode at different scan rates: 10, 50, 100, 150, 200, 250, 300, 350, 400, 450, 500 and 550 mV s<sup>-1</sup> (from bottom to top). Inset: The relationship of scan rates vs. oxidation and reduction peak currents.
